# Supplementary material for: Varying Opinions about Animal Welfare in the Australian Live Export Industry: A Survey
Source: MDPI journal article supplement (doi:10.3390/ani10101864), 2020-10-13
Supplement: s1 [file s1]

# Welfare Indicators

Hello and welcome

---

## Page description:

Unique ID **Action: Hidden Value**

Value: [survey("counter"), startat="WI01"],

 270

Hello,

I am an independent researcher at Murdoch University in Perth, Western Australia, and I am undertaking a research project, funded by Meat and Livestock Australia, to develop key animal welfare measures for the livestock export industry, that:

- are informative about an animals' welfare
- are important to stakeholders (you)
- are practical for assessing livestock (sheep, cattle and goats) throughout the live export supply chain
- are economical, and
- are measurable and quantifiable

We want to know what you think about animal welfare in the live export industry, and what you want.

You have been sent this survey because you either work within the live export industry, or you have an interest in the industry, in particular animal welfare within the industry.

This survey will take approximately 30 minutes to complete.

You can save your progress and continue at a later stage by clicking 'save and continue' at the top of the screen at any point. Please remember to come back and complete the survey because your participation is important to us.

If you are uncomfortable completing the survey online, we can arrange for you to complete the survey by telephone.

We appreciate your time to complete this survey, and ask that you complete the whole survey as accurately and honestly as possible.

Information collected from this survey will be analysed and used to recommend welfare

measures to Meat and Livestock Australia and the livestock export industry.

Your privacy is very important to us. Your participation in this study and any information will be treated in a confidential manner.

This study has been approved by the Murdoch University Human Research Ethics Committee (Approval 2015/013). If you have any reservation or complaint about the ethical conduct of this research, and wish to talk with an independent person, you may contact Murdoch University's Research Ethics Office (Tel. 08 9360 6677 (for overseas studies, +61 8 9360 6677) or e-mail [ethics@murdoch.edu.au](mailto:ethics@murdoch.edu.au)). Any issues you raise will be treated in confidence and investigated fully, and you will be informed of the outcome.

If you have any questions at any time during the completion of this survey, or would like to receive a copy of the results once the study is complete (estimated completion time January 2016) please send me an email at [AWResearch@murdoch.edu.au](mailto:AWResearch@murdoch.edu.au)

Results will also be available on our facebook page

<https://www.facebook.com/animalwelfareresearch> at the completion of the study.

There are comment boxes throughout the survey, if you wish to leave comments as you go.

Thank you

## 1. CONSENT

1. I agree voluntarily to take part in this study.
2. I have read the Information Sheet provided and been given a full explanation of the purpose of this study, the procedures involved and of what is expected of me.
3. I understand that I will be asked to complete a survey
4. The researcher has answered all my questions and has explained possible problems that may arise as a result of my participation in this study.
5. I understand I am free to withdraw from the study at any time without needing to give any reason.
6. I understand I will not be identified in any publication arising out of this study.
7. I understand that my name and identity will be not be collected.
8. I understand that all information provided by me is treated as confidential and will not be released by the researcher to a third party unless required to do so by law.

Do you consent to participate in this survey? \*

- ☐ Yes, I consent to participate in this survey

## Demographics

---

### Page description:

The questions in this section all relate to your background.

All information collected is kept confidential and will not be released to any third party.

ID 3

2. What is your gender?

- ☐ Male
- ☐ Female

ID 4

3. What age category are you?

- ☐ 18-21
- ☐ 21-30
- ☐ 31-40
- ☐ 41-50
- ☐ 51-60
- ☐ 61-70
- ☐ >71

#### 4. Where were you born?

- ☐ Australia
- ☐ New Zealand / South Pacific
- ☐ Middle East
- ☐ Europe
- ☐ Asia
- ☐ Africa
- ☐ North America
- ☐ South America
- ☐ Other

\*

 Show/hide trigger exists.

 391

5. Where are you currently based for work?

If you are not currently working, please select the location of your last employment.

- ☐ Australia
- ☐ New Zealand / South Pacific
- ☐ Middle East
- ☐ Europe
- ☐ Asia
- ☐ Africa
- ☐ North America
- ☐ South America
- ☐ Other

\*

**Logic** Hidden unless: Question "Where are you currently based for work?"

If you are not currently working, please select the location of your last employment." #5 is one of the following answers ("Australia")

**ID** 392

6. In which State or Territory are you based for work?

- ☐ WA
- ☐ SA
- ☐ NSW
- ☐ QLD
- ☐ NT
- ☐ TAS
- ☐ ACT
- ☐ VIC

**ID** 96

7. Where have you lived most of your life?

- ☐ Rural / countryside only
- ☐ City/town only
- ☐ Mainly rural / countryside, some city/town
- ☐ Mainly city/town, some rural / countryside

## 8. What is your highest level of education?

- ☐ Did not complete high school
- ☐ Graduated high school or equivalent
- ☐ Post-secondary school qualification (e.g. diploma)
- ☐ Undergraduate degree
- ☐ Post-graduate degree (e.g. Masters, PhD)



VALIDATION Min = 0 Max = 100

ID 496

9. Rate how important animals are to you in the following roles

Not important

Important

As food

As  
clothing

As a  
companion

For  
working

For  
entertainment  
(i.e.  
racing)

For  
performance  
(i.e.  
circus)

As a  
religious  
symbol

Comments

**Stakeholder group**

---

**Page description:**

ID 272

This section is to determine your connection with the livestock export industry

LOGIC Show/hide trigger exists.

ID 66

10. Do you work with the live export industry (i.e. employed, supply, inspect, research)? \*

- ☐ Yes
- ☐ No

LOGIC Show/hide trigger exists. Hidden unless: Question "Do you work with the live export industry (i.e. employed, supply, inspect, research)?" #10 is one of the following answers ("Yes")

ID 519

11. In which area of the livestock export industry to you work most?

- ☐ Producer / supplier
- ☐ Transport (truck, ship, aeroplane)
- ☐ Export
- ☐ Abattoir
- ☐ Inspection / research

**LOGIC** Hidden unless: Question "In which area of the livestock export industry to you work most?" #11 is one of the following answers ("Transport (truck, ship, aeroplane)")

**ID** 521

12. In which transport areas do you work?

- ☐ Truck company owner / driver
- ☐ Ship owner / Captain
- ☐ Aeroplane owner / pilot
- ☐ Stockperson (ship)
- ☐ Airport freight
- ☐ At the sea port
- ☐ Administration

**LOGIC** Hidden unless: Question "In which area of the livestock export industry to you work most?" #11 is one of the following answers ("Export")

**ID** 525

13. In which export areas do you work?

- ☐ Stockperson at a feedlot
- ☐ Pre-export assembly depot manager
- ☐ Exporter
- ☐ Administration / management

**Logic** Hidden unless: Question "In which area of the livestock export industry to you work most?" #11 is one of the following answers ("Inspection / research")

**ID** 524

14. In which areas do you inspect / research?

- ☐ Truck transport
- ☐ Feedlot (in Australia)
- ☐ Sea or air port (In Australia)
- ☐ On-board ship
- ☐ On-board aeroplane
- ☐ Feedlot (not in Australia)
- ☐ Abattoir (not in Australia)

(untitled)

---

**Page entry logic:**

This page will show when: Question "Do you work with the live export industry (i.e. employed, supply, inspect, research)?" #10 is one of the following answers ("Yes")

**Page description:**

VALIDATION Min = 0 Max = 100

ID 17

15. What percentage of your work is associated with each of the following species? e.g. cattle: 50%, sheep: 40%, goats: 10%.

|        | 0 % |    |    |    |    |    |    |    |    |    |     | 100 % |
|--------|-----|----|----|----|----|----|----|----|----|----|-----|-------|
|        | 0   | 10 | 20 | 30 | 40 | 50 | 60 | 70 | 80 | 90 | 100 |       |
| Cattle |     |    |    |    |    |    |    |    |    |    |     |       |
| Sheep  |     |    |    |    |    |    |    |    |    |    |     |       |
| Goats  |     |    |    |    |    |    |    |    |    |    |     |       |

Comments

LOGIC Show/hide trigger exists.

ID 601

16. Have you ever visited the following? Tick all that apply.

- ☐ Feedlot
- ☐ A live export ship or the port
- ☐ An aircraft carrying livestock
- ☐ Abattoir
- ☐ None of the above

ID 602

17. How many times have you visited each of the following locations?

Cattle   Sheep   Goats

Comments

ID 685

17. On average, how often do you see livestock being transported by truck?

Cattle

Daily  
Once a week  
Once a fortnight  
Once a month  
Once every 6 months

Sheep

Daily  
Once a week  
Once a fortnight  
Once a month  
Once every 6 months

Goats

Daily  
Once a week  
Once a fortnight  
Once a month  
Once every 6 months

Comments

**Page entry logic:**

This page will show when: Question "Do you work with the live export industry (i.e. employed, supply, inspect, research)?" #10 is one of the following answers ("No")

**Page description:****ID 72**

19. What is your interest in the live export industry?

Please select all that apply

- ☐ Relative/friend works in the live export industry
- ☐ Concern for animals
- ☐ Animal welfare advocate
- ☐ Researcher/scientist
- ☐ Journalist/writer/media
- ☐ Don't care about it
- ☐ Other

**LOGIC** Show/hide trigger exists.**ID 615**

20. Have you ever visited or seen the following? Tick all that apply.

- ☐ Livestock being transported by truck
- ☐ Feedlot
- ☐ A live export ship or the port
- ☐ An aircraft carrying livestock
- ☐ Abattoir
- ☐ None of the above

ID 616

21. How many times have you visited each of the following locations?

Cattle   Sheep   Goats

Comments

ID 699

21. On average, how often do you see livestock being transported by truck?

Cattle

Daily  
Once a week  
Once a fortnight  
Once a month  
Once every 6 months

Sheep

Daily  
Once a week  
Once a fortnight  
Once a month  
Once every 6 months

Goats

Daily  
Once a week  
Once a fortnight  
Once a month  
Once every 6 months

Comments



## Page description:

ID 299

This section addresses what you think about animal welfare in the livestock export industry.

ID 117

23. What is your source of knowledge of the livestock export industry?

- ☐ Journalism media (print, television, internet)
- ☐ Social media (Facebook, Twitter etc...)
- ☐ Personal experience
- ☐ Chatting to friends
- ☐ Scientific journals
- ☐ Other

ID 765

24. What is your opinion of the livestock export industry as it is today?

Please indicate for each species

|        | Continue as is        | Continue with improvements | Should stop           | Undecided             |
|--------|-----------------------|----------------------------|-----------------------|-----------------------|
| Cattle | <input type="radio"/> | <input type="radio"/>      | <input type="radio"/> | <input type="radio"/> |
| Sheep  | <input type="radio"/> | <input type="radio"/>      | <input type="radio"/> | <input type="radio"/> |
| Goats  | <input type="radio"/> | <input type="radio"/>      | <input type="radio"/> | <input type="radio"/> |

Comments

25. Do you have concerns about the welfare of animals during the livestock export process?

|                                            | Cattle                                                                                              | Sheep                                                                                               | Goats                                                                                               |
|--------------------------------------------|-----------------------------------------------------------------------------------------------------|-----------------------------------------------------------------------------------------------------|-----------------------------------------------------------------------------------------------------|
| During truck transport not in Australia    | <input type="radio"/> Sometimes<br><input type="radio"/> Frequently<br><input type="radio"/> Always | <input type="radio"/> Sometimes<br><input type="radio"/> Frequently<br><input type="radio"/> Always | <input type="radio"/> Sometimes<br><input type="radio"/> Frequently<br><input type="radio"/> Always |
| At the feedlot in Australia                | <input type="radio"/> Sometimes<br><input type="radio"/> Frequently<br><input type="radio"/> Always | <input type="radio"/> Sometimes<br><input type="radio"/> Frequently<br><input type="radio"/> Always | <input type="radio"/> Sometimes<br><input type="radio"/> Frequently<br><input type="radio"/> Always |
| During loading/unloading at the port (sea) | <input type="radio"/> Sometimes<br><input type="radio"/> Frequently<br><input type="radio"/> Always | <input type="radio"/> Sometimes<br><input type="radio"/> Frequently<br><input type="radio"/> Always | <input type="radio"/> Sometimes<br><input type="radio"/> Frequently<br><input type="radio"/> Always |
| On-board ship during a voyage              | <input type="radio"/> Sometimes<br><input type="radio"/> Frequently<br><input type="radio"/> Always | <input type="radio"/> Sometimes<br><input type="radio"/> Frequently<br><input type="radio"/> Always | <input type="radio"/> Sometimes<br><input type="radio"/> Frequently<br><input type="radio"/> Always |
| On-board aeroplane during a flight         | <input type="radio"/> Sometimes<br><input type="radio"/> Frequently<br><input type="radio"/> Always | <input type="radio"/> Sometimes<br><input type="radio"/> Frequently<br><input type="radio"/> Always | <input type="radio"/> Sometimes<br><input type="radio"/> Frequently<br><input type="radio"/> Always |
| At the feedlot not in Australia            | <input type="radio"/> Sometimes<br><input type="radio"/> Frequently<br><input type="radio"/> Always | <input type="radio"/> Sometimes<br><input type="radio"/> Frequently<br><input type="radio"/> Always | <input type="radio"/> Sometimes<br><input type="radio"/> Frequently<br><input type="radio"/> Always |
| During slaughter (not in Australia)        | <input type="radio"/> Sometimes<br><input type="radio"/> Frequently<br><input type="radio"/> Always | <input type="radio"/> Sometimes<br><input type="radio"/> Frequently<br><input type="radio"/> Always | <input type="radio"/> Sometimes<br><input type="radio"/> Frequently<br><input type="radio"/> Always |

## Comments

(untitled)

---

 481

Now we are going to give you some examples of animal welfare measures and ask your opinions on them.

 705

26. Which of the following indicators do you think are important when assessing animal welfare?

### Description of welfare indicators

\*Behaviour means how an animal is expressing itself, or refers to what an animal is doing

\*\*Body condition score refers to how much fat is on an animal, whereas body weight encompasses the whole animal

\*\*\*Respiration rate and character refers to how quickly and how easily an animal is breathing

\*\*\*\*Rumination rate refers to how quickly food moves through the digestive system

|                                                  | Do you think it is important to measure? |                       |                       | Do you think it is practical to measure? |                       |                       |
|--------------------------------------------------|------------------------------------------|-----------------------|-----------------------|------------------------------------------|-----------------------|-----------------------|
|                                                  | Yes                                      | No                    | Don't know            | Yes                                      | No                    | Don't know            |
| Behaviour                                        | <input type="radio"/>                    | <input type="radio"/> | <input type="radio"/> | <input type="radio"/>                    | <input type="radio"/> | <input type="radio"/> |
| Body condition score                             | <input type="radio"/>                    | <input type="radio"/> | <input type="radio"/> | <input type="radio"/>                    | <input type="radio"/> | <input type="radio"/> |
| Body temperature                                 | <input type="radio"/>                    | <input type="radio"/> | <input type="radio"/> | <input type="radio"/>                    | <input type="radio"/> | <input type="radio"/> |
| Body weight                                      | <input type="radio"/>                    | <input type="radio"/> | <input type="radio"/> | <input type="radio"/>                    | <input type="radio"/> | <input type="radio"/> |
| Death                                            | <input type="radio"/>                    | <input type="radio"/> | <input type="radio"/> | <input type="radio"/>                    | <input type="radio"/> | <input type="radio"/> |
| Disease / health                                 | <input type="radio"/>                    | <input type="radio"/> | <input type="radio"/> | <input type="radio"/>                    | <input type="radio"/> | <input type="radio"/> |
| Heart rate                                       | <input type="radio"/>                    | <input type="radio"/> | <input type="radio"/> | <input type="radio"/>                    | <input type="radio"/> | <input type="radio"/> |
| Physiological status (i.e. pregnant / lactating) | <input type="radio"/>                    | <input type="radio"/> | <input type="radio"/> | <input type="radio"/>                    | <input type="radio"/> | <input type="radio"/> |
| Rumination rate                                  | <input type="radio"/>                    | <input type="radio"/> | <input type="radio"/> | <input type="radio"/>                    | <input type="radio"/> | <input type="radio"/> |
| Respiration rate and character                   | <input type="radio"/>                    | <input type="radio"/> | <input type="radio"/> | <input type="radio"/>                    | <input type="radio"/> | <input type="radio"/> |
| Stress hormones                                  | <input type="radio"/>                    | <input type="radio"/> | <input type="radio"/> | <input type="radio"/>                    | <input type="radio"/> | <input type="radio"/> |
| Wool length                                      | <input type="radio"/>                    | <input type="radio"/> | <input type="radio"/> | <input type="radio"/>                    | <input type="radio"/> | <input type="radio"/> |
| Meat quality                                     | <input type="radio"/>                    | <input type="radio"/> | <input type="radio"/> | <input type="radio"/>                    | <input type="radio"/> | <input type="radio"/> |

Comments

27. Which of the following **health** measures do you think are important when assessing animal welfare?

|                     | Do you think it is important to measure? |                       |                       | Do you think it is practical to measure? |                       |                       |
|---------------------|------------------------------------------|-----------------------|-----------------------|------------------------------------------|-----------------------|-----------------------|
|                     | Yes                                      | No                    | Don't know            | Yes                                      | No                    | Don't know            |
| Presence of disease | <input type="radio"/>                    | <input type="radio"/> | <input type="radio"/> | <input type="radio"/>                    | <input type="radio"/> | <input type="radio"/> |
| Parasites           | <input type="radio"/>                    | <input type="radio"/> | <input type="radio"/> | <input type="radio"/>                    | <input type="radio"/> | <input type="radio"/> |
| Infection           | <input type="radio"/>                    | <input type="radio"/> | <input type="radio"/> | <input type="radio"/>                    | <input type="radio"/> | <input type="radio"/> |
| Injury/wounds       | <input type="radio"/>                    | <input type="radio"/> | <input type="radio"/> | <input type="radio"/>                    | <input type="radio"/> | <input type="radio"/> |
| Lameness            | <input type="radio"/>                    | <input type="radio"/> | <input type="radio"/> | <input type="radio"/>                    | <input type="radio"/> | <input type="radio"/> |
| Pain                | <input type="radio"/>                    | <input type="radio"/> | <input type="radio"/> | <input type="radio"/>                    | <input type="radio"/> | <input type="radio"/> |
| Sneezing            | <input type="radio"/>                    | <input type="radio"/> | <input type="radio"/> | <input type="radio"/>                    | <input type="radio"/> | <input type="radio"/> |
| Coughing            | <input type="radio"/>                    | <input type="radio"/> | <input type="radio"/> | <input type="radio"/>                    | <input type="radio"/> | <input type="radio"/> |
| Nasal discharge     | <input type="radio"/>                    | <input type="radio"/> | <input type="radio"/> | <input type="radio"/>                    | <input type="radio"/> | <input type="radio"/> |
| Faeces structure    | <input type="radio"/>                    | <input type="radio"/> | <input type="radio"/> | <input type="radio"/>                    | <input type="radio"/> | <input type="radio"/> |
| Inability to stand  | <input type="radio"/>                    | <input type="radio"/> | <input type="radio"/> | <input type="radio"/>                    | <input type="radio"/> | <input type="radio"/> |
| Vocalisations       | <input type="radio"/>                    | <input type="radio"/> | <input type="radio"/> | <input type="radio"/>                    | <input type="radio"/> | <input type="radio"/> |

Comments

28. Which of the following **environmental** measures do you think are important when assessing animal welfare?

|                                | Do you think it is important to measure? |                       |                       | Do you think it is practical to measure? |                       |                       |
|--------------------------------|------------------------------------------|-----------------------|-----------------------|------------------------------------------|-----------------------|-----------------------|
|                                | Yes                                      | No                    | Don't know            | Yes                                      | No                    | Don't know            |
| Smell                          | <input type="radio"/>                    | <input type="radio"/> | <input type="radio"/> | <input type="radio"/>                    | <input type="radio"/> | <input type="radio"/> |
| Amount of ventilation          | <input type="radio"/>                    | <input type="radio"/> | <input type="radio"/> | <input type="radio"/>                    | <input type="radio"/> | <input type="radio"/> |
| Air quality                    | <input type="radio"/>                    | <input type="radio"/> | <input type="radio"/> | <input type="radio"/>                    | <input type="radio"/> | <input type="radio"/> |
| Amount of shade                | <input type="radio"/>                    | <input type="radio"/> | <input type="radio"/> | <input type="radio"/>                    | <input type="radio"/> | <input type="radio"/> |
| Amount of shelter from weather | <input type="radio"/>                    | <input type="radio"/> | <input type="radio"/> | <input type="radio"/>                    | <input type="radio"/> | <input type="radio"/> |
| Humidity                       | <input type="radio"/>                    | <input type="radio"/> | <input type="radio"/> | <input type="radio"/>                    | <input type="radio"/> | <input type="radio"/> |
| Air temperature                | <input type="radio"/>                    | <input type="radio"/> | <input type="radio"/> | <input type="radio"/>                    | <input type="radio"/> | <input type="radio"/> |
| Daily amount of light          | <input type="radio"/>                    | <input type="radio"/> | <input type="radio"/> | <input type="radio"/>                    | <input type="radio"/> | <input type="radio"/> |
| Noise                          | <input type="radio"/>                    | <input type="radio"/> | <input type="radio"/> | <input type="radio"/>                    | <input type="radio"/> | <input type="radio"/> |
| Weather                        | <input type="radio"/>                    | <input type="radio"/> | <input type="radio"/> | <input type="radio"/>                    | <input type="radio"/> | <input type="radio"/> |

Comments

VALIDATION Min = 0 Max = 100

ID 733

29. How important is the time an animal spends at any one point along the live export chain?

Not important

Important

During  
truck  
transport

On-board  
a truck  
waiting to  
unload

On-board  
ship  
docked at  
port

On-board  
ship  
during a  
voyage

On-board  
an aircraft  
during a  
flight

At a  
feedlot in  
Australia

At a  
feedlot  
not in  
Australia

Comments

VALIDATION Min = 0 Max = 100

ID 666

30. How important do you think the following factors are for the welfare of livestock in the live export industry?

Not important

Important

Vaccination  
status of  
the  
animal

Access to  
a vet

Design of  
facilities

Cleanliness  
of  
facilities

Competency  
of  
stockperson

Attitude of  
stockpersons

Animals  
can be  
traced  
from farm  
to  
slaughter

Suitability  
of species  
to the  
environment

Keeping  
animals in  
familiar  
social  
groups  
together

Animals  
with horns  
housed  
with  
animals  
without



horns

Amount of  
space the  
animals  
have

Access to  
bedding

Use of an  
electric  
prod

Use of a  
working  
dog

Type of  
food  
available

Feed  
quality

Water  
quality

Temperature  
of  
drinking  
water

Amount of  
trough  
space

Identifying  
animals  
that don't  
eat

Time off  
feed

Time off  
water

Transport  
conditions

Truck  
driver  
behaviour

Appropriate  
restraint  
during  
slaughter

Effective  
slaughter  
procedures

Comments

(untitled)

---

ID 752

31. What do you think measuring animal welfare should be used for?  
Tick all that apply.

- ☐ The industry to self regulate
- ☐ The government to regulate the industry
- ☐ To impose penalties and restrictions for poor welfare
- ☐ To award incentives for good welfare
- ☐ Highlight areas for research
- ☐ Highlight areas for investment in welfare improvement
- ☐ Provide measures of performance to the general public
- ☐ Not used for any reason
- ☐ Other

\*

ID 753

32. Who do you think should be monitoring and measuring animal welfare?  
Tick all that apply.

- ☐ Stockpersons
- ☐ Veterinarians that work for the live export industry
- ☐ Veterinarians that work for the Australian government
- ☐ Veterinarians that work for an overseas government
- ☐ Animal welfare inspectors
- ☐ Independent welfare inspectors
- ☐ Exporters
- ☐ Abattoir animal welfare officers
- ☐ Other

\*

ID 754

33. Do you think that data collected on animal welfare should:

- ☐ be confidential to the industry and government only
- ☐ be available to the public

(untitled)

---

**Page description:**

 Show/hide trigger exists.

 680

34. Are there any other animal welfare measures that we have not mentioned that you think are important?

☐ Yes

☐ No

**Logic** Hidden unless: Question "Are there any other animal welfare measures that we have not mentioned that you think are important?" #34 is one of the following answers ("Yes")

**ID** 435

35. List any animal welfare indicators that we have not mentioned that you think are important?

Please list them in order of importance, with the indicator you think is most important as #1.

|    | Animal welfare indicator | Do you think it is practical to measure? |                       |
|----|--------------------------|------------------------------------------|-----------------------|
|    |                          | Yes                                      | No                    |
| 1  | <input type="text"/>     | <input type="radio"/>                    | <input type="radio"/> |
| 2  | <input type="text"/>     | <input type="radio"/>                    | <input type="radio"/> |
| 3  | <input type="text"/>     | <input type="radio"/>                    | <input type="radio"/> |
| 4  | <input type="text"/>     | <input type="radio"/>                    | <input type="radio"/> |
| 5  | <input type="text"/>     | <input type="radio"/>                    | <input type="radio"/> |
| 6  | <input type="text"/>     | <input type="radio"/>                    | <input type="radio"/> |
| 7  | <input type="text"/>     | <input type="radio"/>                    | <input type="radio"/> |
| 8  | <input type="text"/>     | <input type="radio"/>                    | <input type="radio"/> |
| 9  | <input type="text"/>     | <input type="radio"/>                    | <input type="radio"/> |
| 10 | <input type="text"/>     | <input type="radio"/>                    | <input type="radio"/> |

**ID** 769

Please press the submit button at the bottom of this page

## Thank You!

---

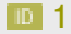

Thank you for taking our survey. Your response is very important to us.

Results of this survey will be used to recommend appropriate animal welfare measures to the livestock export industry.

If you have any questions or comments, you can email me at [AWResearch@murdoch.edu.au](mailto:AWResearch@murdoch.edu.au)

If you would like to receive a copy of the results once the study is complete (estimated completion time January 2016) please send me an email at [AWResearch@murdoch.edu.au](mailto:AWResearch@murdoch.edu.au)  
Results will also be available on our facebook page  
<https://www.facebook.com/animalwelfareresearch> at the completion of the study.
